# Supplementary material
Source: Springer Nature journal article supplement (https://www.springermedizin.de/resource/supplementary/12874_2009_377_MOESM3_ESM.pdf/9434346)
Supplement: MOESM3 [file 9434346]

30 000 practices potentially eligible for recruitment

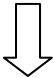

Convenience sample of 2181 practices was drawn

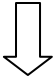

1822 practices were contacted by phone

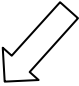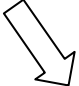

896 practices showed **interest** and received information by fax

**Not interested to participate**  
=> **Reasons?**

**Telephone calls**

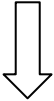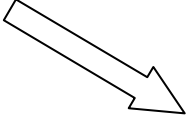

69 practices requested participation agreement

**Not interested in information**  
=> **Reasons?**

**Telephone calls**

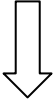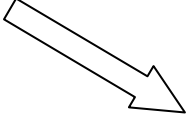

38 practices signed participation agreement

**Agreement not signed**  
=> **Reasons?**

**Telephone calls**
